# Supplementary material for: Postoperative pulmonary complications after sugammadex reversal of neuromuscular blockade: a systematic review and meta-analysis with trial sequential analysis
Source: Springer Nature journal article supplement (doi:10.1186/s12871-023-02094-0), 2023-04-20

### Supplementary file 3: Funnel plot

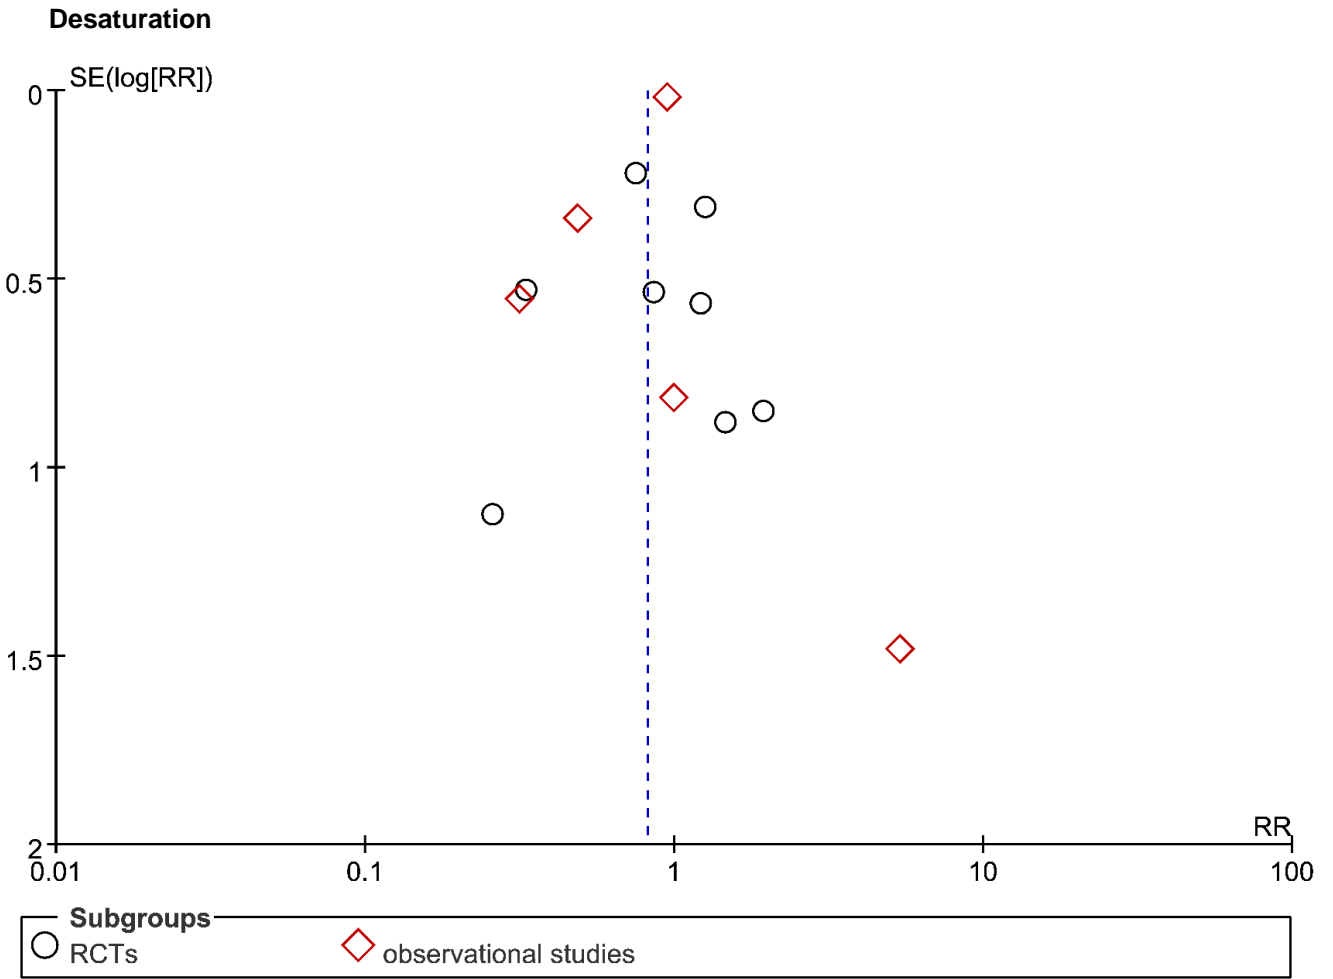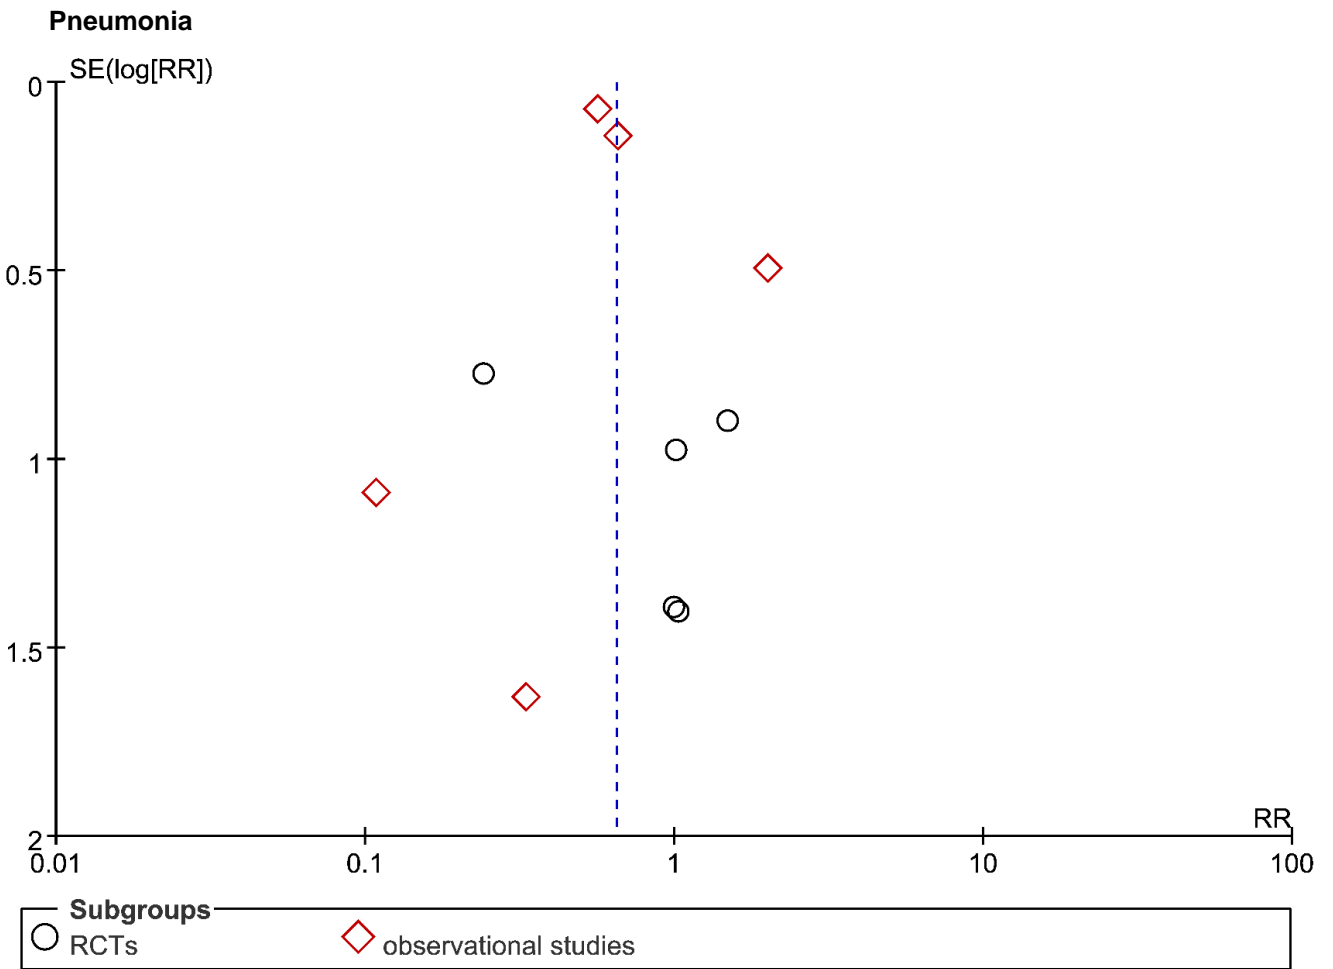

Supplement: MOESM3 [file 25264300]
